# Supplementary material
Source: PubMed Central journal article supplement (PMC4140627)
Supplement: NIHMS614974-supplement-01.pdf [file NIHMS614974-supplement-01.pdf]

# Engineering vascular tissue with functional smooth muscle cells derived from human iPSC cells and nanofibrous scaffolds

Yongyu Wang, Jiang Hu, Jiao Jiao, Zhongning Liu, Zhou Zhou, Chao Zhao, Lung-Ji Chang, Y. Eugene Chen, Peter X. Ma, Bo Yang

## Supplementary Materials

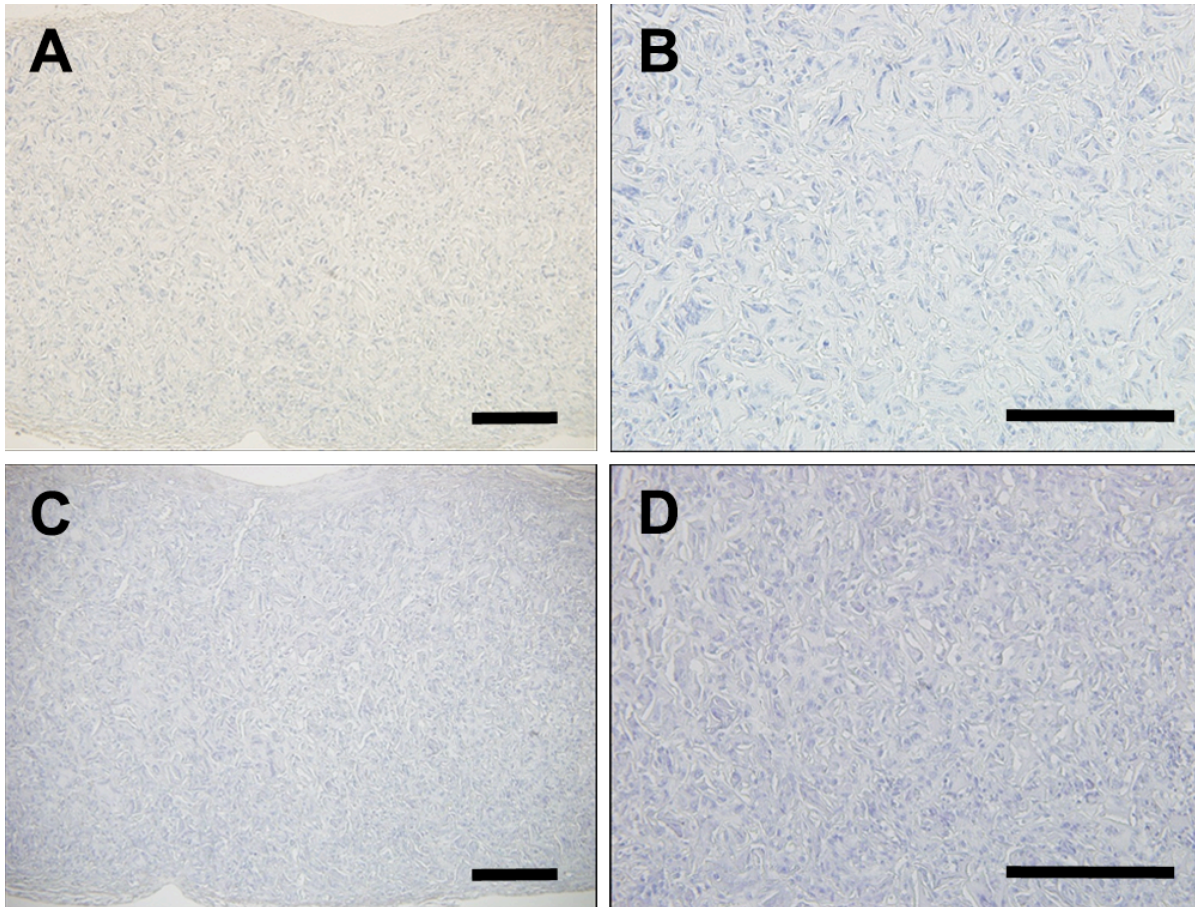

**Fig. S1** Negative control of immunohistochemical staining for (A, B) SM22 $\alpha$  and (C, D) CNN1 and  $\alpha$ -SMA.

## List of Supplementary Movies

**Movie S1** Contractile response of primary aortic SMCs.

**Movie S2** Contractile response of human iPSC line 1-derived SMCs.

**Movie S3** Contractile response of human iPSC line 2-derived SMCs.

## Supplementary Tables

**Table S1.** Primary and secondary antibodies used for immunofluorescence staining, immunohistochemistry and flow cytometry analysis

| Antibodies                     | Source      | Dilution | Manufacturer                         | Cat. NO.  |
|--------------------------------|-------------|----------|--------------------------------------|-----------|
| OCT4                           | Rabbit IgG  | 1:100    | Stemgent                             | 09-0023   |
| SOX2                           | Rabbit IgG  | 1:100    | Stemgent                             | 09-0024   |
| NANOG                          | Rabbit IgG  | 1:100    | Stemgent                             | 09-0020   |
| TRA-1-60                       | Mouse IgM   | 1:100    | Stemgent                             | 09-0010   |
| TRA-1-81                       | Mouse IgM   | 1:100    | Stemgent                             | 09-0011   |
| SSEA3                          | Rat IgM     | 1:100    | Developmental Studies Hybridoma Bank | MC-631    |
| SSEA4                          | Mouse IgG3  | 1:100    | Developmental Studies Hybridoma Bank | MC-813-70 |
| $\alpha$ -SMA                  | Mouse IgG2a | 1:500    | Sigma                                | A5228     |
| SM22 $\alpha$                  | Rabbit IgG  | 1:500    | Abcam                                | ab14106   |
| CNN1                           | Mouse IgG1  | 1:500    | Sigma                                | C2687     |
| TUJ1                           | Mouse IgG2a | 1:500    | Covance                              | MMS-435P  |
| $\alpha$ -1-fetoprotein        | Rabbit IgG  | 1:400    | Dakocytomation                       | A0008     |
| FITC $\alpha$ -SMA             | Mouse IgG2a | 1:50     | Sigma                                | F3777     |
| Alexa 594 Goat Anti-Mouse IgG  | Goat IgG    | 1:1000   | Life Technologies                    | A11005    |
| Alexa 488 Goat Anti-Rabbit IgG | Goat IgG    | 1:1000   | Life Technologies                    | A-11008   |
| Alexa 594 Goat Anti-Rat IgG    | Goat IgG    | 1:1000   | Life Technologies                    | A-11007   |
| APC Anti-Mouse IgG1            | Rat IgG     | 1:100    | eBioscience                          | 17-4015   |
| FITC Mouse IgG2a Isotype       | Mouse IgG2a | 1:50     | eBioscience                          | 8011-4724 |

**Table S2.** Primers used for qRT-PCR

| <b>Genes</b>  |         | <b>Sequences (5'→3')</b> |
|---------------|---------|--------------------------|
| $\alpha$ -SMA | Forward | CACTGTCAGGAATCCTGTGA     |
|               | Reverse | CAAAGCCGGCCTTACAGA       |
| SM22 $\alpha$ | Forward | TCTTTGAAGGCAAAGACATGG    |
|               | Reverse | TTATGCTCCTGCGCTTTCTT     |
| CNN1          | Forward | GTCCACCCTCCTGGCTTT       |
|               | Reverse | AAACTTGTTGGTGCCCATCT     |
| GAPDH         | Forward | AAGGTGAAGGTCGGAGTCAAC    |
|               | Reverse | GGGGTCATTGATGGCAACAATA   |

**Table S3.** Primers used for RT-PCR

| <b>Genes</b> |         | <b>Sequences (5'→3')</b> | <b>Expected band size (bp)</b> |
|--------------|---------|--------------------------|--------------------------------|
| OCT4         | Forward | CTGCAGTGTGGGTTTCGGGCA    | 169                            |
|              | Reverse | CTTGCTGCAGAAGTGGGTGGAGGA |                                |
| NANOG        | Forward | TAGCAATGGTGTGACGCAGA     | 615                            |
|              | Reverse | CCTCGCTGATTAGGCTCCAA     |                                |
| SOX2         | Forward | ATGCACCGCTACGACG         | 437                            |
|              | Reverse | CTTTTGCACCCCTCCCATTT     |                                |
| GAPDH        | Forward | GTGGACCTGACCTGCCGTCT     | 152                            |
|              | Reverse | GGAGGAGTGGGTGTCGCTGT     |                                |
